# Supplementary material
Source: Research Square preprint supplement (doi:10.21203/rs.3.rs-9552742/v1)
Supplement: Supplementary file 1 [file fd945f10319ece7dc289ed1f.docx]

**CONSORT 2025 checklist of information to include when reporting a randomised trial***

| **Section / Topic** | **No** | **CONSORT 2025 checklist item description** | **Reported on page no.** |
| --- | --- | --- | --- |
| **Title and abstract** | | |  |
| Title and structured abstract | 1a | Identification as a randomised trial | p. 1–2 (Title page and Abstract) |
| 1b | Structured summary of the trial design, methods, results, and conclusions | p. 1–2 (Abstract — structured) |
| **Open science** | | |  |
| Trial registration | 2 | Name of trial registry, identifying number (with URL) and date of registration | p. 14–15 (Trial registration). ClinicalTrials.gov, NCT07554248, registered 28 April 2026 (retrospectively registered). https://clinicaltrials.gov/study/NCT07554248 |
| Protocol and statistical analysis plan | 3 | Where the trial protocol and statistical analysis plan can be accessed | Not applicable — no separate trial-specific study protocol document; the broader research project was approved by the institutional ethics committee (SKE 01-31/2023) |
| Data sharing | 4 | Where and how the individual de-identified participant data (including data dictionary), statistical code and any other materials can be accessed | p. 14–15 (Availability of data and materials). The anonymised processed dataset is available in the Zenodo repository: https://doi.org/10.5281/zenodo.19651175 |
| Funding and conflicts of interest | 5a | Sources of funding and other support (e.g., supply of drugs), and role of funders in the design, conduct, analysis and reporting of the trial | p. 14–15 (Funding) |
| 5b | Financial and other conflicts of interest of the manuscript authors | p. 14–15 (Competing interests) |
| **Introduction** | | |  |
| Background and rationale | 6 | Scientific background and rationale | p. 2–4 (Introduction — Background and rationale) |
| Objectives | 7 | Specific objectives related to benefits and harms | p. 3–4 (Introduction — Objectives) |
| **Methods** | | |  |
| Patient and public involvement | 8 | Details of patient or public involvement in the design, conduct and reporting of the trial | Not applicable — basic science kinematic study with healthy adolescent swimmers; no patient or public involvement in study design, conduct, or reporting |
| Trial design | 9 | Description of trial design including type of trial (e.g., parallel group, crossover), allocation ratio, and framework (e.g., superiority, equivalence, non-inferiority, exploratory) | p. 4–6 (Methods — Study Design). Randomised crossover trial; 1:1 allocation; exploratory framework |
| Changes to trial protocol | 10 | Important changes to the trial after it commenced including any outcomes or analyses that were not prespecified, with reason | Not applicable — no changes to the protocol after the trial commenced |
| Trial setting | 11 | Settings (e.g., community, hospital) and locations (e.g., countries, sites) where the trial was conducted | p. 5–6 (Methods). Indoor swimming pool at Koncertowa 4, 02-785 Warsaw, Poland (Józef Piłsudski University of Physical Education) |
| Eligibility criteria | 12a | Eligibility criteria for participants | p. 4–5 (Methods — Participants). 32 adolescent swimmers (15 girls, 17 boys); age ≈13 years; ≥2 years of regular training; exclusion: injury, age-criteria not met, insufficient training experience |
| 12b | If applicable, eligibility criteria for sites and for individuals delivering the interventions (e.g., surgeons, physiotherapists) | p. 5–6 (Methods). All exercise sessions were supervised by two experienced swimming coaches certified at Level I by the Polish Swimming Federation |
| Intervention and comparator | 13 | Intervention and comparator with sufficient details to allow replication. If relevant, where additional materials describing the intervention and comparator (e.g., intervention manual) can be accessed | p. 5–6 (Methods — Exercise Conditions / Procedures) |
| Outcomes | 14 | Pre-specified primary and secondary outcomes, including the specific measurement variable (e.g., systolic blood pressure), analysis metric (e.g., change from baseline, final value, time to event), method of aggregation (e.g., median, proportion), and time point for each outcome | p. 6–8 (Methods — Outcomes). Primary: front crawl kinematic variables measured by accelerometer (ωmaxR, AmaxR, ωmaxY, atmax, ωmaxP, asmax, avmax). Secondary: 50 m time and stroke length |
| Harms | 15 | How harms were defined and assessed (e.g., systematically, non-systematically) | Not applicable — low-intensity training in healthy adolescent swimmers; no harms anticipated or observed |
| Sample size | 16a | How sample size was determined, including all assumptions supporting the sample size calculation | p. 4–5 (Methods — Sample size). A priori power analysis (G*Power) determined N = 32 as adequate |
| 16b | Explanation of any interim analyses and stopping guidelines | Not applicable — no interim analyses or stopping guidelines |
| Randomisation: |  |  |  |
| Sequence generation | 17a | Who generated the random allocation sequence and the method used | p. 4–6 (Methods — Study Design). Random allocation sequence generated by MS using simple randomisation with the RAND() function in Microsoft Excel |
| 17b | Type of randomisation and details of any restriction (e.g., stratification, blocking and block size) | p. 4–6 (Methods — Study Design). Simple randomisation |
| Allocation concealment mechanism | 18 | Mechanism used to implement the random allocation sequence (e.g., central computer/telephone; sequentially numbered, opaque, sealed containers), describing any steps to conceal the sequence until interventions were assigned | p. 4–6 (Methods — Study Design). No formal allocation concealment mechanism implemented; acknowledged as a study limitation |
| Implementation | 19 | Whether the personnel who enrolled and those who assigned participants to the interventions had access to the random allocation sequence | p. 4–6 (Methods — Study Design). MS, together with a certified Level I swimming coach (Polish Swimming Federation), enrolled participants and assigned them to the intervention sequences according to the pre-generated allocation list |
| Blinding | 20a | Who was blinded after assignment to interventions (e.g., participants, care providers, outcome assessors, data analysts) | p. 4–6 (Methods — Study Design). No masking (blinding) of participants, coaches, or assessors performed, owing to the nature of the interventions |
| 20b | If blinded, how blinding was achieved and description of the similarity of interventions | Not applicable — no blinding implemented |
| Statistical methods | 21a | Statistical methods used to compare groups for primary and secondary outcomes, including harms | p. 7–9 (Methods — Statistical Analysis). Includes ANOVA model with prior experience as a between-subjects factor; tests of normality and sphericity |
| 21b | Definition of who is included in each analysis (e.g., all randomised participants), and in which group | Not applicable — no additional ad-hoc analyses performed |
| 21c | How missing data were handled in the analysis | Not applicable — no missing data; all 32 participants completed both conditions |
| 21d | Methods for any additional analyses (e.g., subgroup and sensitivity analyses), distinguishing prespecified from post-hoc | Not applicable — no subgroup or sensitivity analyses |
| **Results** | | |  |
| Participant flow, including flow diagram | 22a | For each group, the numbers of participants who were randomly assigned, received intended intervention, and were analysed for the primary outcome | Figure 3 (CONSORT 2025 flow diagram) |
| 22b | For each group, losses and exclusions after randomisation, together with reasons | Figure 3 (CONSORT 2025 flow diagram). Of 34 swimmers initially assessed for eligibility, 2 were excluded (unable to attend testing day due to acute illness); 32 were randomised; all completed both exercise conditions and were included in the analysis (no losses, no exclusions post-randomisation) |
| Recruitment | 23a | Dates defining the periods of recruitment and follow-up for outcomes of benefits and harms | p. 4–6 (Methods). Recruitment and data collection: 14–21 June 2024 |
| 23b | If relevant, why the trial ended or was stopped | Not applicable — trial completed as planned |
| Intervention and comparator delivery | 24a | Intervention and comparator as they were actually administered (e.g., where appropriate, who delivered the intervention/comparator, how participants adhered, whether they were delivered as intended [fidelity]) | p. 8–10 (Methods / Results). All 32 participants completed both exercise conditions as planned |
| 24b | Concomitant care received during the trial for each group | p. 4–6 (Methods). During the 1-week washout period, all participants continued their regular swimming training programme (7–8 sessions per week of standard club training); no additional tethered swimming training during washout |
| Baseline data | 25 | A table showing baseline demographic and clinical characteristics for each group | p. 4–5 (Methods — Participants); Table 1 (baseline by sex); Table 2 (baseline by allocation sequence) |
| Numbers analysed,  outcomes and estimation | 26 | For each primary and secondary outcome, by group:   - the number of participants included in the analysis - the number of participants with available data at the outcome time point - result for each group, and the estimated effect size and its precision (such as 95% confidence interval) - for binary outcomes, presentation of both absolute and relative effect size | p. 8–11 (Results); Tables and Figures |
| Harms | 27 | All harms or unintended events in each group | Not applicable — no harms or unintended events observed |
| Ancillary analyses | 28 | Any other analyses performed, including subgroup and sensitivity analyses, distinguishing pre-specified from post-hoc | Not applicable — no ancillary analyses performed |
| **Discussion** | | |  |
| Interpretation | 29 | Interpretation consistent with results, balancing benefits and harms, and considering other relevant evidence | p. 10–14 (Discussion — Interpretation) |
| Limitations | 30 | Trial limitations, addressing sources of potential bias, imprecision, generalisability, and, if relevant, multiplicity of analyses | p. 10–15 (Discussion — Limitations and Generalisability) |

*We strongly recommend reading this statement in conjunction with the CONSORT 2025 Explanation and Elaboration and/or the CONSORT 2025 Expanded Checklist for important clarifications on all the items. We also recommend reading relevant CONSORT extensions. See [www.consort-spirit.org](http://www.consort-spirit.org).

Citation: Hopewell S, Chan AW, Collins GS, Hróbjartsson A, Moher D, Schulz KF, et al. CONSORT 2025 Statement: updated guideline for reporting randomised trials. BMJ. 2025; 388:e081123. <https://dx.doi.org/10.1136/bmj-2024-081123>.

© 2025 Hopewell et al. This is an Open Access article distributed under the terms of the Creative Commons Attribution License (<https://creativecommons.org/licenses/by/4.0/>), which permits unrestricted use, distribution, and reproduction in any medium, provided the original work is properly cited.
